# Supplementary material for: On-chip-angiogenesis based on a high-throughput biomimetic three-dimensional cell spheroid culture system
Source: Royal Society of Chemistry journal article supplement (doi:10.1039/d3an00817g), 2023-01-01
Supplement: d3an00817g1.pdf [file d3an00817g1.pdf]

## **On-chip-angiogenesis based on a high-throughput biomimetic three-dimensional cell spheroid culture system**

Yachao Wang,<sup>⊥a,b</sup> Xuemei Zeng,<sup>⊥a</sup> Peng Chen,<sup>a</sup> Wei Du,<sup>a</sup> Yumei Pei,<sup>\*c</sup> Guoping Wang<sup>\*a</sup> and Bi-Feng Liu<sup>a</sup>

a. The Key Laboratory for Biomedical Photonics of MOE at Wuhan National Laboratory for Optoelectronics-Hubei Bioinformatics & Molecular Imaging Key Laboratory, Systems Biology Theme, Department of Biomedical Engineering, College of Life Science and Technology, Huazhong University of Science and Technology, Wuhan 430074, China.

b. Department of Ultrasound, the First Affiliated Hospital of Zhengzhou University, Zhengzhou 450052, China.

c. Department of Pharmacy, Wuxi People's Hospital Attached to Nanjing Medical University, Wuxi 214023, China.

⊥These authors contributed equally to this work.

\* Corresponding author.

### **Corresponding author**

\*Email: wangguoping@hust.edu.cn (G.W.); 79660672@qq.com (Y. P.)

Tel: +86-27-87792203

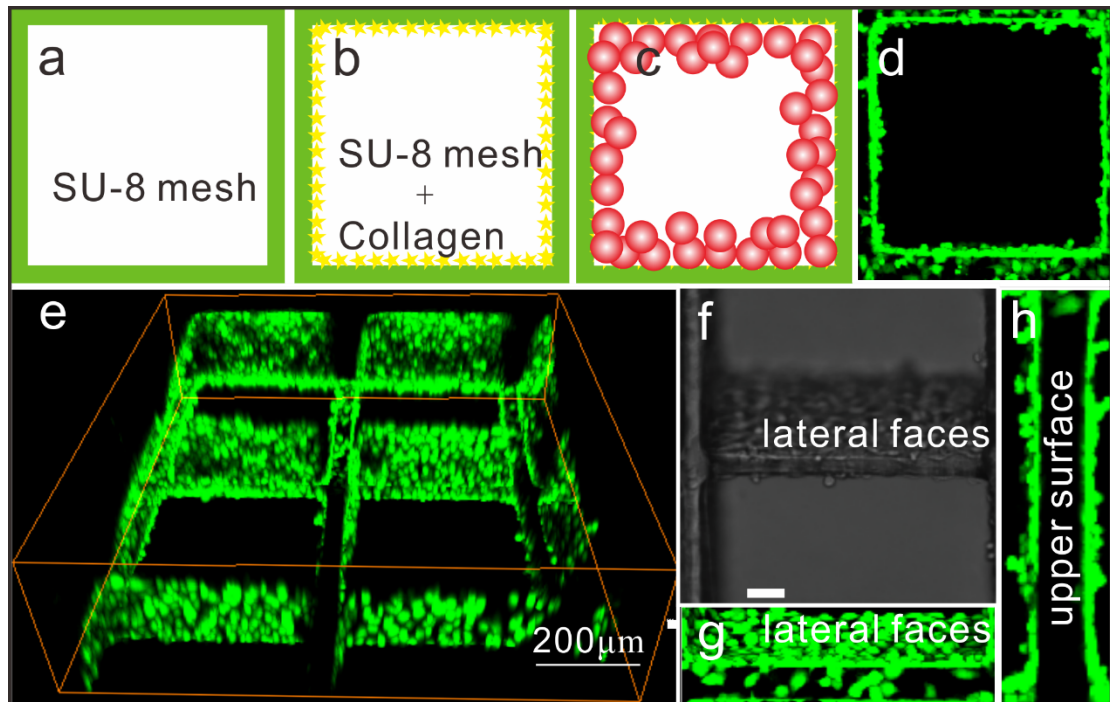

**Fig. S1** HUVECs seeding results on the lateral face of meshes. (a-c) The schematic diagram of HUVEC cell seeding process principle, the yellow star represents collagen; (d) The results of the cell seeded into each mesh; (e) 3D reconstructed cell confocal images of cells seeded in chip; (f) Bright field image of cells adhered on the SU-8 mesh lateral faces; (g) Fluorescence image of cells adhered on the SU-8 mesh lateral faces; (h) Overlooking fluorescence field image of cell aggregates adhered on the SU-8 mesh lateral faces.

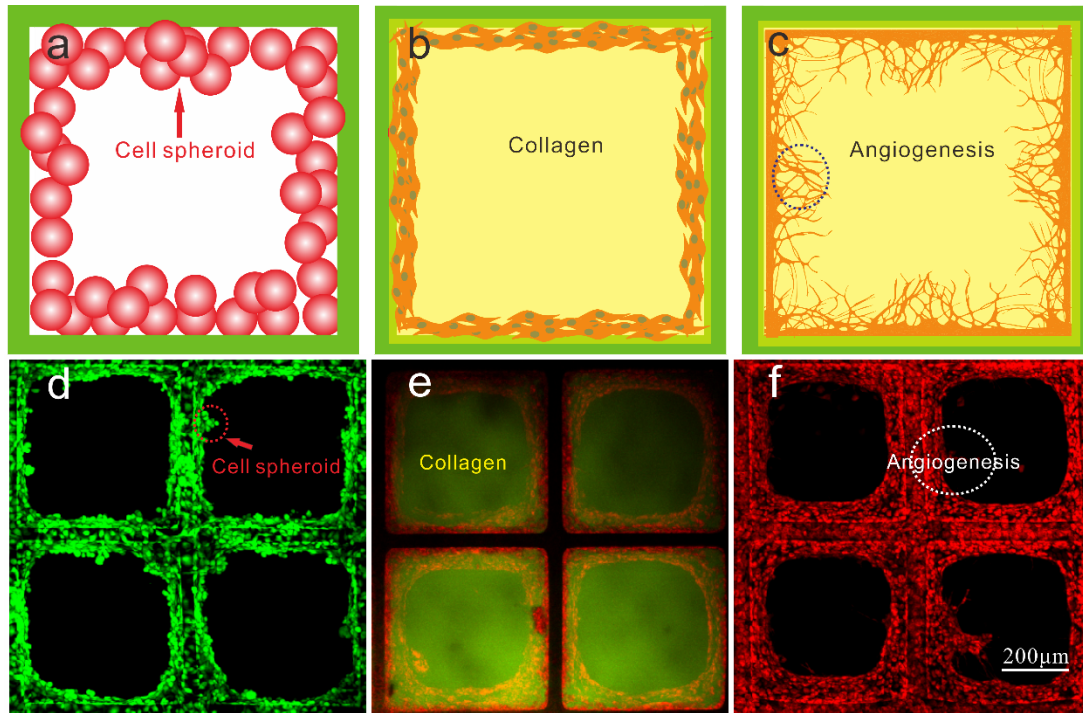

**Fig. S2** HUVECs embedded into collagen hydrogel.(a-c)The diagrammatic sketches of the processes of filling collagen hydrogel into meshes and the angiogenesis processes in collagen;(d) HUVECs were unevenly distributed in the chip grid before filling the hydrogel; (e) A more uniform and smooth multilayer cellular structure in hydrogels, the collagen labeled with FITC-collagen (Green) and the HUVECs labeled with cell Tracker™ Orange CMRA Dye (Red); (f) HUVECs began migrate and sprout to collagen hydrogel.

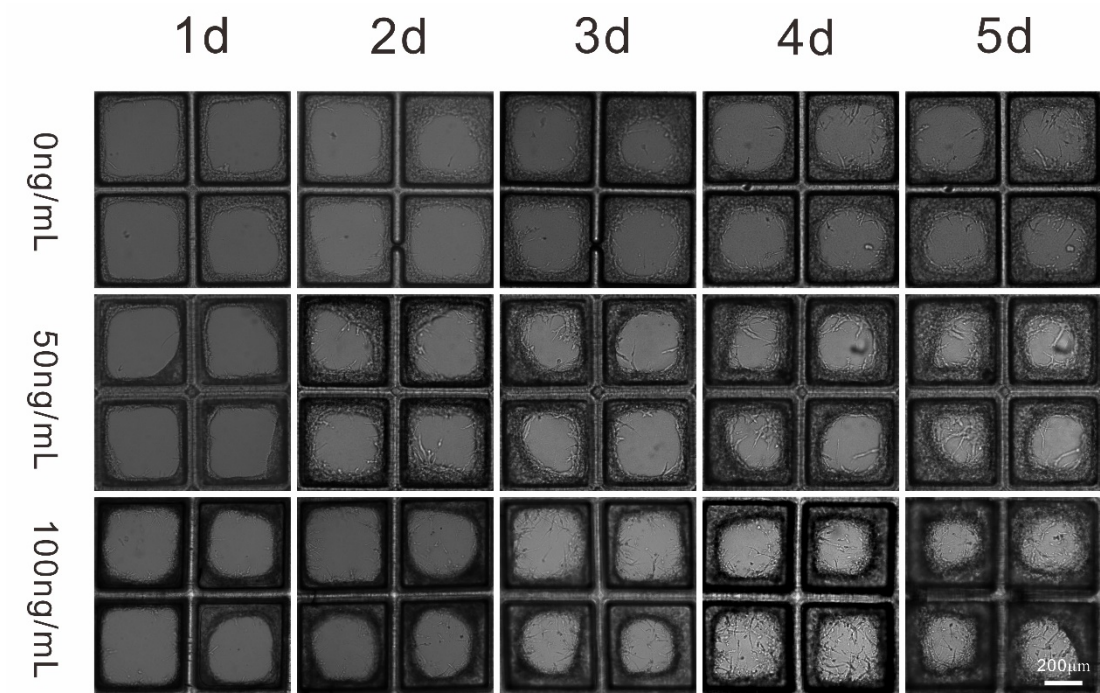

**Fig. S3** The on-chip-angiogenesis processes under different concentrations of VEGF (0ng/mL, 50ng/mL, 100ng/mL).

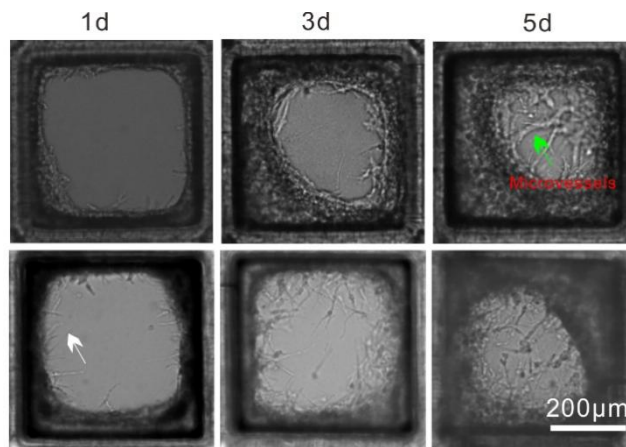

**Fig. S4** Enlarged images of the sprouts at 50 and 100ng/mL VEGF concentration. The white arrow denotes the nascent sprouts from the 3D multilayer HUVECs in the well, the green arrow indicates the microtubules that grown in the presence of VEGF.
